# Supplementary material for: Ionic liquid-assisted synthesis of CdSe dendrites from nanospheres through oriented attachment
Source: Royal Society of Chemistry journal article supplement (doi:10.1039/c0dt01212b), 2011-01-01

# Ionic Liquid-Assisted Synthesis of CdSe Dendrites from Nanospheres through Oriented Attachment

(Supporting Information)

*Xiaochuan Duan, Xiaodi Liu, Qing Chen, Haobo Li, Jie Li, Xia Hu, Yingying Li, Jianmin Ma and  
Wenjun Zheng\**

Department of Materials Chemistry and Key Laboratory of Advanced Energy Materials Chemistry  
(MOE), College of Chemistry, Nankai University, Tianjin, 300071, P. R. China

Corresponding Author: Prof. Wenjun Zheng

Address: Department of Materials Chemistry, College of Chemistry,

Nankai University, Tianjin, P. R. China

Phone: +86-22-23507951

Fax: +86-22-23502458

E-mail: [zhwj@nankai.edu.cn](mailto:zhwj@nankai.edu.cn)

**Scheme.** The general structural of ILP [BMIm][SeO<sub>2</sub>(OCH<sub>3</sub>)].

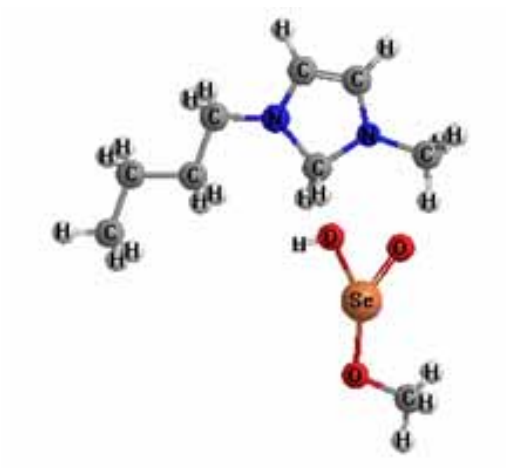

**Figure S1.** (a) SEM image of the obtained CdSe microcrystals; (b) XRD pattern of the obtained CdSe using  $\text{Na}_2\text{SeO}_3$  as Se sources.

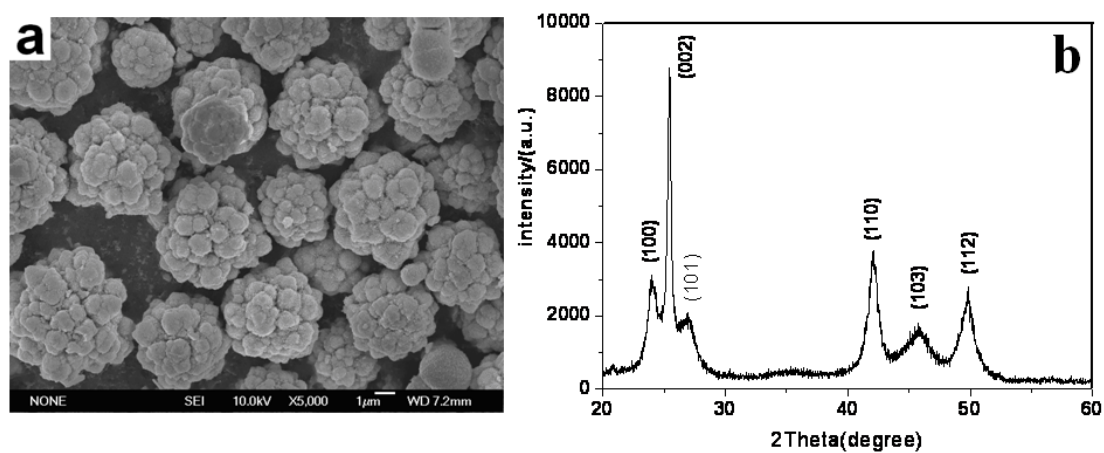

Supplement: c0dt01212b.pdf [file c0dt01212b.pdf]
